# Supplementary material
Source: MDPI journal article supplement (https://www.mdpi.com/2313-0105/4/2/18)
Supplement: s1 [file s1]

# An In-Situ Reference Electrode Insertion Method for Commercial 18650-Type Cells

Limhi Somerville <sup>1</sup>, Stefania Ferrari <sup>2,\*</sup>, Michael J. Lain <sup>1</sup>, Andrew McGordon <sup>1</sup>, Paul Jennings <sup>1</sup> and Rohit Bhagat <sup>1</sup>

## Third Electrode Results

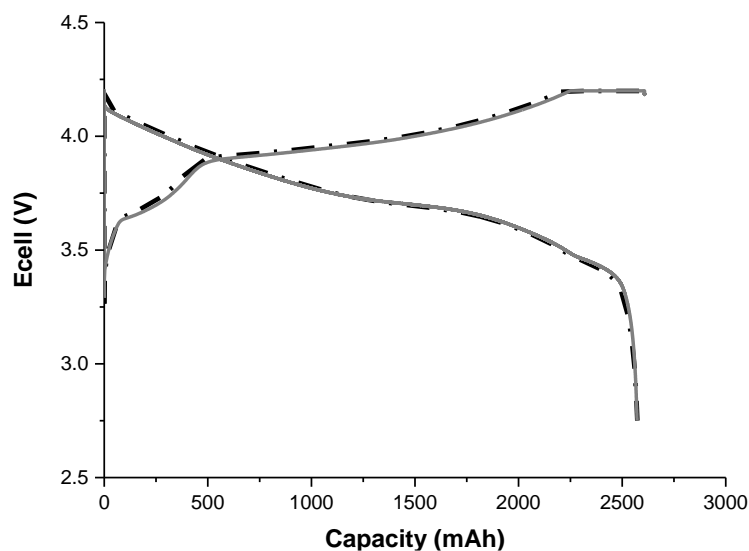

**Figure S1.** Comparison of cell potential of 18650 cells cycled at 25 °C, one with (solid line) and one without (dashed line) reference electrode (2nd cycle, 0.4 C rate).

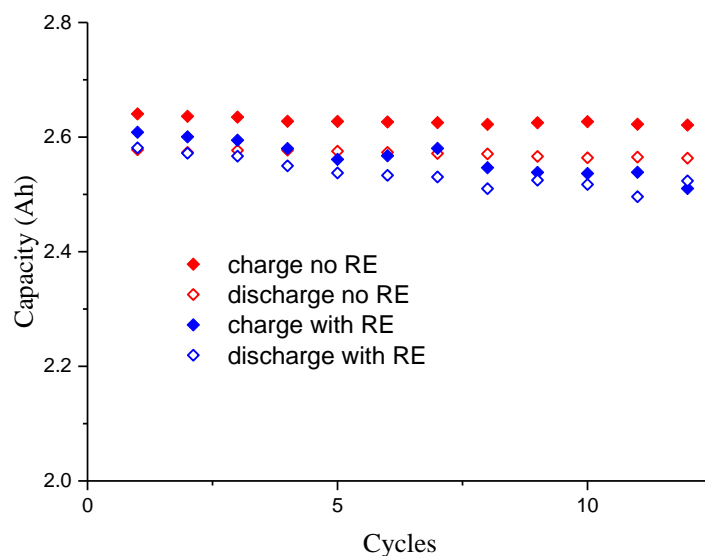

**Figure S2.** Cycling behavior at 25 °C of a second cell made with RE and an unmodified cell. Both the cells are pristine.
